# Supplementary material for: High and rising burden of hip and knee osteoarthritis in the Nordic region, 1990–2015: Findings from the Global Burden of Disease Study 2015
Source: PubMed Central journal article supplement — Acta Orthop. 2017 Nov 21;89(2):177–83. doi: 10.1080/17453674.2017.1404791 (PMC5901515; doi:10.1080/17453674.2017.1404791), 2017-11-21
Supplement: IORT_A_1404791_SM0058.pdf [file IORT_A_1404791_SM0058.pdf]

## Supplementary data

Table 3. Actual and counterfactual changes of total years with disability (YLDs) due to osteoarthritis between 1990 and 2015

| Location      | Observed YLDs, 1990 | Expected YLDs 2015 from |                              | Observed YLDs, 2015 | Percent change due to |                   |                                 | Actual change |
|---------------|---------------------|-------------------------|------------------------------|---------------------|-----------------------|-------------------|---------------------------------|---------------|
|               |                     | population growth       | population growth and ageing |                     | population growth     | population ageing | age- and sex-specific YLD rates |               |
| Global        | 6,251,503           | 8,689,565               | 11,605,002                   | 12,886,225          | 39.0                  | 46.6              | 20.5                            | 106.1         |
| Nordic region | 36,745              | 42,111                  | 48,608                       | 52,661              | 14.6                  | 17.7              | 11.0                            | 43.3          |
| Denmark       | 9,352               | 10,398                  | 12,114                       | 13,057              | 11.2                  | 18.3              | 10.1                            | 39.6          |
| Finland       | 7,561               | 8,411                   | 11,127                       | 11,733              | 11.2                  | 35.9              | 8.0                             | 55.2          |
| Greenland     | 42                  | 41                      | 72                           | 78                  | -2.6                  | 72.0              | 13.7                            | 83.2          |
| Iceland       | 323                 | 413                     | 542                          | 589                 | 28.1                  | 39.8              | 14.7                            | 82.7          |
| Norway        | 6,453               | 7,867                   | 8,469                        | 9,128               | 21.9                  | 9.3               | 10.2                            | 41.5          |
| Sweden        | 13,014              | 14,928                  | 16,352                       | 18,076              | 14.7                  | 10.9              | 13.2                            | 38.9          |

Percent change in total YLDs

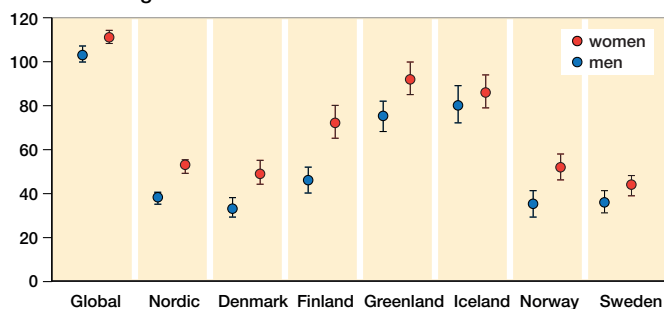

Percent change in age standardized YLDs rate

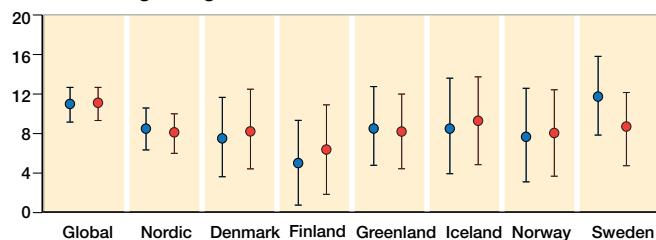

Figure S1. Percentage change (95% UI) in total and age-standardized years lived with disability (YLDs) due to osteoarthritis between 1990 and 2015, by sex and location.

YLDs rank

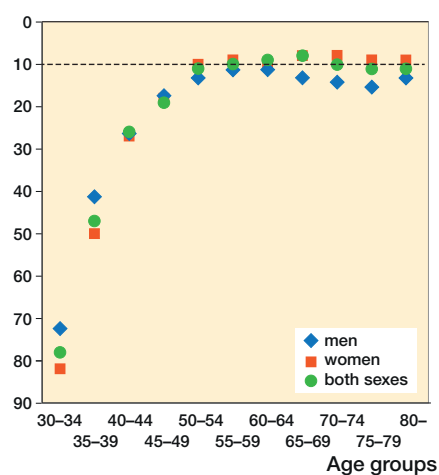

Figure S2. The rank of osteoarthritis among 315 causes in terms of total years lived with disability (YLDs) in the Nordic region in 2015, by sex and age group (lower number indicates higher relative importance).

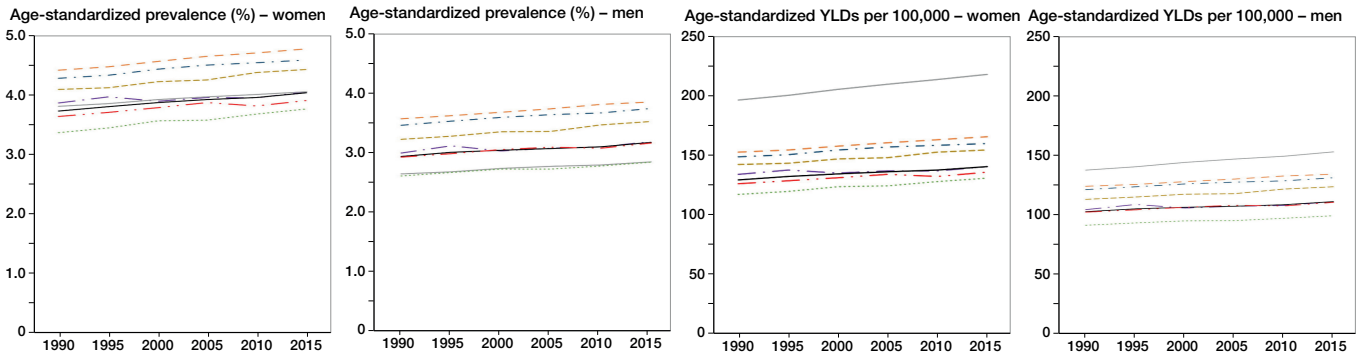

Figure S3. Age-standardized prevalence (%) and years lived with disability (YLDs) of osteoarthritis 1990–2015, by sex and location.

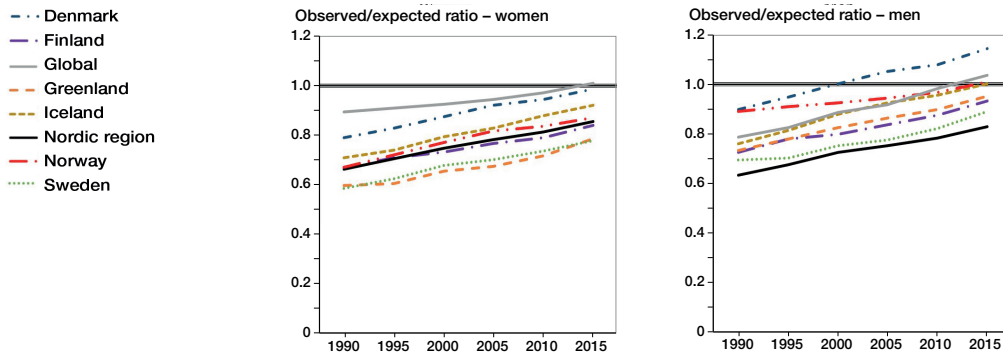

Figure S4. The ratio of observed age-standardized years lived with disability (YLDs) of osteoarthritis to expected YLDs on the basis of sociodemographic index alone 1990–2015, by sex and location.

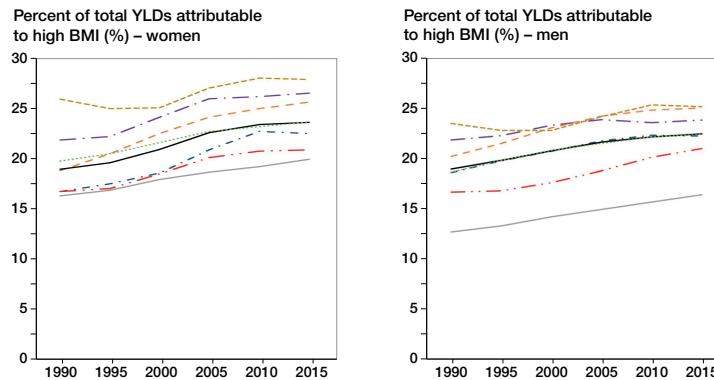

Figure S5. Proportion of total years lived with disability due to osteoarthritis attributable to high body mass index ( $\geq 22.5 \text{ kg/m}^2$ ) 1990–2015, by sex and location.
